## **Expanding the repertoire of glucocorticoid receptor target genes by engineering genomic response elements**

Verena Thormann<sup>1</sup>, Laura V. Glaser<sup>1</sup>, Maika C. Rothkegel<sup>1</sup>, Marina Borschiwer<sup>1</sup>, Melissa Bothe<sup>1</sup>, Alisa Fuchs<sup>1</sup>, Sebastiaan H. Meijnsing<sup>1§</sup>

<sup>1</sup>Max Planck Institute for Molecular Genetics, Ihnestr  e 63-67, 14195 Berlin, Germany

<sup>§</sup> Corresponding author

Contact information:

Sebastiaan H. Meijnsing  
Max Planck Institute for Molecular Genetics  
Ihnestr  e 63-73  
14195, Berlin, Germany  
Tel: +49-30-84131176  
Email: [meijnsing@molgen.mpg.de](mailto:meijnsing@molgen.mpg.de)

## Abstract

The glucocorticoid receptor (GR), a hormone-activated transcription factor, binds to a myriad of genomic binding sites yet seems to regulate a much smaller number of genes. Genome-wide analysis of GR binding and gene regulation has shown that the likelihood of GR-dependent regulation increases with decreased distance of its binding to the transcriptional start site of a gene. To test if we can adopt this knowledge to expand the repertoire of GR target genes, we used homology directed repair (HDR)-mediated genome editing to add a single GR binding site directly upstream of the transcriptional start site of four genes. To our surprise, we found that the addition of a single GR binding site can be enough to convert a gene into a GR target. The gain of GR-dependent regulation was observed for two out of four genes analyzed and coincided with acquired GR binding at the introduced binding site. However, the gene-specific gain of GR-dependent regulation could not be explained by obvious differences in chromatin accessibility between converted genes and their non-converted counterparts. Further, by introducing GR binding sequences with different nucleotide compositions, we show that activation can be facilitated by distinct sequences without obvious differences in activity between the GR binding sequence variants we tested. The approach to use genome engineering to build genomic response elements facilitates the generation of cell lines with tailored repertoires of GR-responsive genes and a framework to test and refine our understanding of the *cis*-regulatory logic of gene regulation by testing if engineered response elements behave as predicted.

## Introduction

*Cis*-regulatory elements embedded in the genome encode the information to relay environmental and developmental cues into specific patterns of gene expression. The information is decoded by transcription factors (TFs), which bind to *cis*-regulatory elements and set in motion a cascade of events to change the expression level of genes. Typically, *cis*-regulatory elements harbor clusters of binding sites for several different TFs and the combinatorial nature of the response element allows different outcomes depending on which combination of transcription factors is active in a given cell type or under given environmental conditions (reviewed in [1]). Divergence in gene regulation may also play a role in adaptation and speciation [2] and can be driven by the loss or gain of TF binding sites that can occur rapidly over evolutionary time [3].

Ligand-activated TFs, such as the glucocorticoid receptor (GR), represent an attractive model TF to study the link between TF binding and gene regulation. An appealing feature of GR to study gene regulation is that its activity can be turned on or off by the addition or removal of its ligand (*e.g.* dexamethasone, a synthetic glucocorticoid ligand). This on/off switch facilitates the relatively straightforward identification of target genes by comparing gene expression levels between untreated cells and cells treated with hormone. Studies with GR have shown that the genes regulated by GR differ considerably between cell types [4, 5]. Accordingly, the genomic loci bound by GR show little overlap between different cell types [4, 6, 7]. Furthermore, cross-talk with NF $\kappa$ B signaling can alter the repertoire of genomic loci bound and of the genes regulated by GR [8, 9]. The sequence composition of *cis*-regulatory elements also plays a role in fine-tuning the expression level of individual genes. For instance, GR binds as a dimer to typically imperfect half sites separated by a 3 bp spacer and the exact sequence of the half site, the spacer and of the nucleotides flanking the GR binding sequence (GBS) can modulate GR's activity towards target genes [10, 11].

GR can bind to tens of thousands of genomic binding sites, yet seems to regulate a smaller number of genes [4, 7, 12, 13]. Part of the discrepancy between GR binding and gene regulation might be due to GR's inability to activate gene expression for a subset of occupied sites [14]. Another part could reflect the inability of distal GR binding sites to contribute to gene regulation because they lack the physical proximity to the promoter of a gene. Accordingly, the link between GR binding and gene regulation is especially weak for peaks located at large distances from the promoter of genes except when the three dimensional organization of the genome brings these distal GR peak proximal to the promoter of a gene [13]. Nonetheless, even when taking three dimensional genome organization into account, GR binding is a poor predictor of GR-dependent gene regulation with only a subset of binding events (< 25%) resulting in the regulation of associated genes [13]. Recent advances in genome editing now offer opportunities to assay the contribution of endogenous TF-bound regions to gene regulation. For example, by perturbing TF-bound regions in their endogenous genomic context, their contribution to gene regulation can be assessed [15]. Similarly, catalytically inactive Cas9 fused to repressor domains, *e.g.* Krüppel-associated box (KRAB), can be targeted to candidate *cis*-regulatory elements to assess their regulatory function in the genomic context [15, 16]. Finally, a fine-grained dissection of the interplay of TF binding sites within *cis*-regulatory elements can uncover operating principles of active regulatory elements, *e.g.* that a cluster of GR binding sites is required for the activity of an individual enhancer located near the GR target gene *GILZ* [13]. A complementary, largely unexplored, way to study TF binding sites is to employ genome editing combined with homology directed repair to build functional response elements. By

building synthetic *cis*-regulatory elements, the minimal sequence requirements for a functional response element and their ability to recapitulate existing expression patterns can be researched.

As described above, genome-wide approaches and perturbation of endogenous response elements can be used to identify operating principles of functional GR binding sites. One approach to test the validity of these findings is to determine if we can “engineer” *cis*-regulatory elements based on these principles in the genomic context. One of the principles we identified is that the likelihood of GR-dependent regulation increases with decreased distance of its binding site to the transcriptional start site (TSS) of a gene. To test if adding a single GR binding site is sufficient to convert genes into GR targets, we used homology directed repair (HDR)-mediated genome editing to generate cell lines with a single GR binding sequence immediately upstream of their transcriptional start site. In addition, we compared GBS variants to test if the sequence identity of the binding site influences GR-dependent gene regulation.

## Results

### **Addition of a single promoter-proximal GBS can render a gene GR-responsive**

To study what is required to convert endogenous genes into GR targets, we first set out to add a single GBS near the TSS of four candidate genes using CRISPR/Cas9 and homology directed repair (HDR) templates (Fig. 1). To increase our chances of observing GR-dependent regulation, we picked a GBS variant (CGT), which showed the highest GR-dependent activation in previous studies [10, 11]. The candidate genes were selected based on the following criteria. First, we chose genes that are not regulated by GR and display low basal levels of expression (Fig. 1). This was motivated by studies showing that ectopic activation using CRISPRa (CRISPR activation) works best for genes with low expression levels [17, 18]. Second, because HDR efficiency decreases with increased distance between the cut site and the mutation [19], we only considered genes with a possible guide RNA located  $\leq 50$  bp upstream of its TSS. We chose to place the GBS close to the TSS because proximal GR-bound regions are more likely to influence the expression of nearby genes than their distal counterparts [13]. Third, we selected guide RNAs with high computationally predicted specificity and low off-target scores [20] and prioritized genes for which a low number of nucleotide exchanges were needed to introduce a GBS. Finally, to increase HDR efficiency, we chose candidates for which introduction of the GBS resulted in PAM-blocking or guide-blocking mutations [19].

Using this approach, we selected single-cell-derived clonal lines for which one allele harbored the engineered GBS  $\leq 50$  bp upstream of the TSS of four genes (*GYPC*, *IL1B*, *IL1R2* and *VSIG1*, Fig 1, Fig S1) in U2OS cells stably expressing GR (U2OS-GR, [21]). As expected, basal expression levels in the absence of hormone were unaffected by the introduced GBS for each of the genes analyzed (Fig. 2). Next, we tested if the addition of a single GBS was sufficient to convert the nearby gene into a GR target and observed a robust increase in transcript levels for both the *IL1B* and *IL1R2* genes upon treatment with the synthetic glucocorticoid dexamethasone (Fig. 2b, c). The activation of the *IL1B* and *IL1R2* genes was observed for each of multiple independent clonal lines with an added GBS that we tested



(Fig. 2b, c). Furthermore, no activation was observed for parental U2OS-GR cells or for unedited clonal controls (Fig. 2b, c) showing that the observed activation is a consequence of the GBS addition. For the other two genes we edited (*GYPC* and *VSIG1*), the GBS addition did not convert the gene into a GR target (Fig. 2a, d). Together, these experiments show that the addition of a single GBS near the TSS of a gene can be sufficient to convert it into a GR target.

### **Gene-specific GR binding partially explains the gene specific acquirement of GR-dependent regulation upon GBS addition.**

To test if locus-specific GR binding could explain the gene-specific acquired activation, we analyzed GR binding at the added GBSs by Chromatin Immunoprecipitation (ChIP). Consistent with the acquired GR-dependent activation, we found that GR was recruited to the *IL1R2* and *IL1B* loci upon hormone treatment for clonal lines with an added GBS, whereas no binding was observed for unedited control cells (Fig. 2f, g). For the *GYPC* gene, the ChIP-seq data for the parental U2OS-GR shows a small peak immediately upstream of its TSS (Fig. 1b). Accordingly, we find a modest hormone-dependent recruitment of GR to the TSS of *GYPC* for unedited cells, which was slightly higher for the clonal line with an added GBS (Fig. 2e). For the *VSIG1* gene, no GR recruitment was observed regardless of whether a GBS was added or not (Fig. 2h). Importantly, for all clonal lines analyzed we observed robust hormone-dependent GR binding at the endogenous *GILZ* locus, which served as a positive control (pos. ctrl) and shows that the ChIP efficiency was comparable between our clonal lines (Fig. 2e-h).

Given GR's preference for binding at accessible chromatin [7], differences in accessibility could explain the locus-specific binding of GR to the added GBS. To test this hypothesis, we generated ATAC-seq (assay for transposase-accessible chromatin, [22]) data for parental U2OS-GR cells both in the presence and absence of dexamethasone. Visual inspection of the ATAC-seq data revealed a similar, relatively low, ATAC-seq signal (Fig. 1b-e) for each of the loci examined. This indicates that the regions where we added the GBS are relatively inaccessible and that the gene-specific binding does not appear to be a consequence of marked differences in chromatin accessibility between regions. Similarly, H3K27ac levels, a marker of active enhancers, were similarly low in untreated cells for each of the genes analyzed (Fig. 1b-e).

To test if activation by another transcriptional activator shows the same gene-specific activation pattern as GR, we targeted dCas9-SAM [17] to the TSS of each of the four candidate genes. The dCas9-SAM system is a powerful tool to activate genes upon TSS-proximal recruitment and consists of a nucleolytically dead Cas9 protein fused to the VP64 activation domain. In addition, the system uses a modified guide RNA containing two MS2 stem loops that recruit MS2-p65-HSF1 fusion proteins to further boost activation. Targeting of dCas9-SAM to the TSS of the *IL1R2* and *IL1B* genes resulted in a robust activation (> 100 fold increase over control non-targeting guide RNA, Fig. 3). In contrast, targeting dCas9-SAM to the TSS of genes that did not acquire GR-dependent activation upon GBS addition,

resulted in a marginal activation (2.9 fold) for *VSIG1* whereas the *GYPC* gene was not activated by dCas9-SAM (Fig. 3).

Together, our results show a similar pattern of activation by GR and by targeting the dCas9-SAM system that cannot be explained by obvious differences in chromatin accessibility based on ATAC-seq data. For GR, this gene-specific activation can be partially explained by gene-specific GR recruitment. Specifically, the most robust GR recruitment was observed for the two genes that acquired GR-dependent regulation upon GBS addition whereas no binding was detected for *VSIG1*, which could not be converted into a GR target.

### **Activation of the endogenous *IL1R2* gene by GBS variants**

GR is known to bind directly to a broad spectrum of sequences that differ in their precise sequence composition [23]. In addition to recruiting GR to defined genomic loci, the sequence of the binding site can also modulate the activity of GR downstream of binding [10, 11, 23]. To test if GBS variants, other than the CGT variant we initially tested, can accommodate GR-dependent regulation of the *IL1R2* gene, we generated single-cell-derived clonal lines for 3 additional GBS variants (Fig. 4a, Fig. S2). We picked two GBS variants (PAL and GILZ) that showed markedly lower activities than the CGT sequence in previous studies using reporter assays and one with comparable activity (FKBP5-2) [10, 11]. Next, we tested if these GBS variants could also convert the *IL1R2* gene into a GR target and found that this was the case for each of the variants tested (Fig. 4b). Accordingly, ChIP analysis showed GR binding at the TSS of the *IL1R2* gene upon the addition of each GBS variant tested (Fig. 4c).

For a quantitative comparison between the GBS variants, we generated multiple independent clonal lines for each GBS variant ( $n \geq 3$ ). This is important for a meaningful comparison between GBS variants given the high degree of variability in the level of activation observed between individual clones with the same GBS variant (Fig. 2c). However, when we averaged the level of activation across clonal lines with the same GBS, we observed no significant differences between the GBS variants in the levels of *IL1R2* activation (Fig. 4b). As expected, this was also the case for the endogenous target gene *DUSP1*, a GR target gene located on another chromosome, which served as an internal control to ensure that GR activity was comparable across clonal lines (Fig. 4b). Similarly, the kinetics of *IL1R2* activation after GR activation by dexamethasone was comparable for each of the GBS variants (Fig. 4d and Fig. S4 for the unedited control gene *DUSP1*). Taken together, these results indicate that several GBS variants can convert the *IL1R2* gene into a GR target with similar levels of activation for each variant.

### **Comparison of engineered GBS variants at the endogenous *GILZ* enhancer**

We previously showed that deletion of an individual endogenous GBS (GBS1, Fig. 5a) resulted in a partial reduction (~60%) of hormone-induced *GILZ* levels when compared to either parental U2OS-GR cells or to unedited clonal controls ([13] and Fig. 5b). To test if other GBS variants can substitute for the endogenous GBS1, we first analyzed the activity of several variants using a luciferase reporter (Fig. 5c, d). We found that the level of activation was comparable for different GBS variants with the exception of the PAL sequence, a high-

affinity GBS variant [10], which showed a lower level of activation (Fig. 5d). Based on these findings, we decided to use homology directed repair to convert the endogenous GBS1 to the FKBP5-2 or to the PAL sequence (Fig. S3), the two variants with the highest and lowest reporter activity, respectively. Next, we analyzed the effect of changing the sequence of the endogenous GBS1 using HDR, and found that the level of activation for the PAL and FKBP5-2 variants was markedly higher than that observed when the GBS1 was deleted (Fig. 5b, e). In fact, the activation for both variants was indistinguishable from the activation observed for parental U2OS-GR cells or for unedited clonal controls (Fig. 5e). This was also observed for the unedited *DUSP1* gene, which serves as a control to make sure that GR activity is comparable among the clonal lines we analyzed (Fig. 5e). Notably, the *in vitro* affinity of GR for the PAL sequence is an order of magnitude higher than for the endogenous GBS1 sequence [10]. To test if the higher affinity of GR for the PAL sequence might facilitate *GILZ* activation at lower hormone concentrations, we assayed the levels of activation observed at 100 pM and 10 nM dexamethasone. Consistent with our expectation, activation of the *GILZ* gene was lower at lower hormone concentrations (Fig. 5f). However, when comparing GBS variants at a given hormone concentration, we observed similar levels of activation, indicating that the sequence identity of the GR binding site does not affect the dose response of the *GILZ* gene (Fig. 5f and Fig. S5a for the unedited control gene *FKBP5*). Similarly, the kinetics of activation after hormone treatment was comparable for each of the GBS variants analyzed (Fig. 5g and Fig. S5b for the unedited control gene *DUSP1*). Together, these results indicate that both the PAL and the FKBP5-2 GBS variants can substitute for the original GBS1 sequence at the *GILZ* gene without apparent differences between GBS variants in the level of GR-dependent activation observed.

## Discussion

The ultimate quest in deciphering *cis*-regulatory logic is to reach a level of understanding that would allow an accurate quantitative and qualitative prediction of gene expression levels based on regulatory sequence composition. If identified, such knowledge would *e.g.* facilitate the rational design of gene regulatory circuits to generate cells with desired gene expression patterns. A broad range of methods can help identify the rules that govern transcriptional output, including perturbation experiments, genome-wide mapping of functional elements and high through-put reporter assays to measure the activity of promoter and enhancer regions [24]. By building synthetic circuits, the accuracy of the elusive regulatory code can be tested and can help identify possible gaps in our knowledge when the predicted results are in conflict with the measured transcriptional output. Here we used genome editing to evaluate two traits associated with GR-dependent gene regulation.

The first trait we evaluated is the positive correlation between GR-dependent regulation of a gene and promoter-proximal GR binding [13]. By adding a promoter-proximal GBS to several genes, we could demonstrate that the addition of a single GR binding site can be sufficient to convert a gene normally not regulated by GR into a target gene. For the converted genes

(*IL1B* and *IL1R2*, Fig. 2), we observed robust GR recruitment to the added GBS. In contrast, either no recruitment or a less robust acquired recruitment of GR was found for the genes that could not be converted (*VSIG1* and *GYPE*, Fig. 2) indicating that GR binding is required for the acquired GR-dependent regulation. Interestingly, the equivalent gene-specific ability to activate genes was found for the synthetic dCas9-SAM activator. Since GR almost exclusively binds to regions of open chromatin [7], differences in chromatin accessibility would provide a straightforward explanation for the gene-specific acquired activation observed. However, arguing against this explanation, we did not observe obvious differences in chromatin accessibility or differences in H3K27ac levels between converted genes and genes that could not be converted into GR targets (Fig. 1). An alternative explanation for the gene-specific acquirement of activation could be that the sequence context for the *IL1R2* and *IL1B* encodes recognition sequences for factors that accommodate GR binding and activation from the introduced GBS. Sequence features that accommodate GR-dependent activation could be identified computationally. However, this would require the editing of a larger number of genes to find common features among converted genes. Alternatively, we could disrupt candidate sequences present at converted genes to assay their role in accommodating GR-dependent activation. Notably, the initial response element we introduced consisted of just a single GBS sequence, which to our surprise was sufficient to convert some genes into GR targets. Likely, activation of other genes required more complex response elements consisting of multiple GBSs or of a GBS and binding sites for TFs known to synergize with GR [25]. In addition, the ability of a single GBS to convert a gene into a GR target might be cell type-specific, something we intend to test in the future.

Profound changes in GR occupancy patterns are also observed when GR binding is compared between mouse and human macrophages [26]. This divergence is accompanied by changes in the repertoire of responsive genes between species and is associated with gains and losses of GR recognition sequences [26]. Similar to the targeted nucleotide substitutions we introduced here, the evolutionary turnover of GR binding sites is predominantly driven by nucleotide substitutions as a consequence of mutations [26]. Notably, in contrast to the promoter proximal GBSs we added, most of the endogenous GR binding occurs promoter distal [4, 7, 12]. In fact, GR binding is biased against accessible chromatin located at promoter regions, which can be partially explained by the presence of fewer GR recognition sequences in promoter regions when compared to their promoter-distal counterparts [4, 12]. A possible reason for this bias is that there might be selection against promoter-proximal GR binding to safe-guard cell type-specific transcriptional consequences of glucocorticoid signaling given that promoter-proximal GR binding is associated with gene regulation regardless of cell type examined whereas distal binding is more likely to result in cell type specific gene regulation [4].

The second trait we evaluated is the sequence of GR's DNA-binding site, which can influence the magnitude of transcriptional activation by GR [10, 11, 27]. By changing the sequence identity of the introduced GR binding site at the *IL1R2* gene and of a GBS at an endogenous GR-bound region near the *GILZ* gene, we found that distinct variants facilitate equivalent levels of GR-dependent activation. This indicates that the sequence identity of the GBS does

not direct markedly distinct levels of activation for either locus examined. Our findings in the genomic context are in contrast to previous studies showing that the sequence identity of the GBS can have an impact on the magnitude of GR-dependent activation [10, 11]. One possible explanation for this discrepancy is that our approach may not have the sensitivity to detect subtle differences in activity. For example, due to the high levels of variation in the level of activation we observe for a given GBS variant when comparing individual clonal lines (Fig. 4c). This clonal variability precludes the identification of significant differences when small numbers of clonal lines are analyzed. Another possible explanation is that the ability of GBS variants to induced different levels of activation is context-specific. Notably, the expression of endogenous GR target genes can be controlled by one or by multiple GR-bound enhancers [13, 28], which might mask GBS-specific activities. Furthermore, studies showing GBS-specific activities [10, 27, 29] were performed using minimal promoters (SV40 or thymidine kinase) whereas we studied activation from the endogenous promoters of the *GILZ* and *IL1R2* genes respectively. Thus, GBS-specific levels of activation might only occur for specific types of promoters, an idea we would like to pursue in forthcoming studies.

Taken together, our engineering of *cis*-regulatory elements argue for an unsophisticated enhancer logic [30] where a single occupied GBS can be sufficient to activate genes when it is located promoter-proximal. Moreover, we find that acquired activation can be mediated by distinct GR binding sequence variants without obvious differences in activity between variants. To our knowledge, this is the first study to use genome engineering to add a binding site for a TF to expand its repertoire of endogenous target genes. We started by building response elements consisting of just a single GR binding site. By adding complexity to the response element, increasing the distance between the response element and the promoter and by analyzing larger numbers of genes, the engineering approach provides a framework to refine our understanding of the *cis*-regulatory logic of gene regulation which would ultimately facilitate the construction of cells with desired gene expression profiles.

## Material and Methods

### Cell culture, transient transfections and luciferase assays

U2OS cells with stably integrated rat GR alpha [21] were cultured in DMEM supplemented with 5% FBS at 37°C and 5% CO<sub>2</sub>. The pGILZ1 construct containing a GR-bound region near the *GILZ* gene driving a luciferase reporter gene has been described previously [31]. GBS1, encoded in the pGILZ1 construct, was mutated by site-directed mutagenesis using primers listed in Table 1. Transient transfections of U2OS-GR cells were performed as described previously [10]. Luciferase activity was measured using the Dual Luciferase reporter assay kit (Promega).

### RNA-seq U2OS-GR cells

RNA-seq data for U2OS-GR cells was generated as previously described [32], except that cells were treated with 1 μM dexamethasone for 24h in addition to the 4h treatment.

### **ATAC-seq U2OS-GR cells**

For ATAC-seq, U2OS-GR cells were treated with 1 $\mu$ M dexamethasone or vehicle control (ethanol) for 90 minutes. ATAC-seq was performed with 100,000 cells per treatment according to the Omni-ATAC-seq protocol [33], with the following modifications: (1) The transposase reaction was stopped precisely after 30 minutes through the addition of 2.5  $\mu$ l of 10% Sodium Dodecyl Sulfate (SDS), (2) The transposed DNA fragments were PCR amplified using the p5-containing primer 5'–AATGATACGGCGACCACCGAGATCTACACTCGTCGGCAGCGTC–3' and the p7-containing primer 5'–CAAGCAGAAGACGGCATAACGAGATGTAAGTACGTCTCGTGGGCTCGG–3' or 5'–CAAGCAGAAGACGGCATAACGAGATTTCAAGTGGTCTCGTGGGCTCGG–3' (p7-containing primers have different barcodes for multiplexed sequencing).

Libraries were sequenced on an Illumina HiSeq 4000 with 50bp paired-end reads to a sequencing depth of 50M reads. Raw reads were mapped to the reference assembly hg19 using Bowtie2 v.2.1.0 (--very-sensitive) [34]. SAMtools [35] was used for conversion of SAM to BAM files and sorting. Duplicate reads were removed with Picard tools v.2.17.0 (MarkDuplicates) (<http://broadinstitute.github.io/picard/>). BigWig files were generated with bamCoverage from deepTools [36].

### **Chromatin Immunoprecipitation (ChIP and ChIP-seq)**

ChIP-qPCR for GR was performed as previously described [13] using primers listed in Table 2 and Table 3. For H3K27ac ChIP-seq experiments, U2OS-GR cells were treated for 1.5 h with either 1  $\mu$ M dexamethasone or 0.1% ethanol as vehicle control, harvested and cross-linked with 1% formaldehyde for 3 min. Chromatin was precipitated using 1 $\mu$ g of anti-H3K27ac antibody (Diagenode C15410196). Sequencing libraries were prepared using the NEBNext Ultra DNA Library Prep kit (NEB E7370) according to manufacturer's instructions and submitted for paired-end Illumina sequencing. Data processing: Paired-end Illumina sequencing reads were mapped to the human genome (hg19) using STAR (--alignIntronMax 1) [37] and converted to the bigWig format for visualization.

### **Genome editing**

The HDR templates for genome editing were generated by cloning a ~2kb genomic region flanking the targeted integration site (genomic coordinates of cloned regions listed in Table 4) into the zero blunt PCR cloning vector (Thermo Fisher Scientific). Sequence changes in these templates were introduced by site directed mutagenesis, using the primers listed in Table 1. To avoid repeated Cas9-editing modifications, the added GBSs overlapped with the gRNA target sequence (genomic location of introduced GBSs listed in Table 5). gRNAs for genome editing (Table 6) were designed using the CRISPOR webtool (<http://crispor.tefor.net/>) and cloned into the sgRNA/Cas9 expression construct PX459 (Addgene #62988). To generate clonal lines with HDR-induced sequence changes, U2OS-GR cells were transfected using 600 ng of the gRNA construct and 3  $\mu$ g of the HDR template by nucleofection (Lonza Nucleofector Kit V) according to the manufacturer's instructions. Subsequently, successfully transfected cells were selected by treating cells with puromycin



(2.5 µg/ml) for 24h. To increase gene editing by HDR, we treated transfected cells for 24 h with 10 µM SCR7 (XcessBio Biosciences). Single-cell derived clonal cell lines were genotyped by PCR using genomic DNA isolated with the DNeasy blood and tissue kit (Qiagen) and primers binding outside the HDR template.

### **RNA preparation and analysis by quantitative real time PCR (qPCR)**

Cells were cultured to confluency and treated with dexamethasone or vehicle control (ethanol) for the times and hormone concentrations as indicated in the figure legends. After the hormone treatment, RNA was extracted, reverse transcribed and analyzed by qPCR as described previously [10] using the primer pairs listed in Table 7. For the analysis of lowly-expressed genes (*IL1R2*, *VSIG1*, *IL1B* and *GYPE*), the cDNA was diluted 1:3.5; for all other genes 1:25.

### **dCas9-SAM activation of endogenous genes**

To test if dCas9-SAM could activate endogenous target genes when recruited to the sites where we added the GBSs, we created gRNAs containing MS2 loops by cloning the target sequence (Table 6) into the sgRNA(MS2) plasmid (Addgene #61424). Next, U2OS-GR cells were transfected with 600 ng each of the MS2-containing gRNA, dCas9-VP64 expression construct (Addgene #48223) and a MS2-p65-HSF1 activator expression construct (Addgene #61423) by nucleofection (Lonza Nucleofector Kit V) according to the manufacturer's instructions. 24h after transfection, total RNA was isolated using the RNeasy kit (Qiagen), DNase-I digested and reverse transcribed using random primers (NEB) and analyzed by qPCR using primers listed in Table 7.

### **Data access**

Data to create the genome-browsed screenshots (Fig 1, Fig. 4A, Figure S1 and Fig. S3) was from published studies: ChIP-seq data: E-MTAB-2731; RNA-seq data for U2OS-GR cells E-MTAB-6738. Unpublished data (ATAC-seq, H3K27ac ChIP-seq and RNA-seq for U2OS cells treated with dex for 24 h) will be deposited at either GEO or Arrayexpress prior to publication.

### **Acknowledgements**

We thank Edda Einfeldt for excellent technical support. This work was supported by the Else Kröner-Fresenius-Stiftung (Grant 2014\_A152 to S.H.M. and M.B.).

### **Author contributions**

V.T., L.V.G, M.C.R., M.B., M.B., A.F. and S.H.M. performed and conceived experiments and analyzed the data. V.T. and S.H.M. designed and supervised the study and wrote the manuscript with input from all authors.

### **Figure Legends**

**Figure 1. Genes selected for genomic GBS integration at the respective promoter region.**

(a) Overview of the experimental design of our study. (b-e) Tracks showing H3K27ac and GR ChIP-seq normalized tag density, ATAC-seq and RNA-seq reads for U2OS-GR cells treated as indicated. Genomic regions surrounding the loci of GBS integration are shown for *GYPC* (b), *IL1B* (c), *IL1R2* (d) and *VSIG1* (e). The genomic site targeted for GBS integration is highlighted in blue and its distance in base pairs (bp) to the transcription start site (TSS) is indicated. (f) Homology directed repair (HDR)-mediated genome editing to introduce the CGT GBS upstream of the *IL1R2* gene. The sequence of the gRNA, the sequence of the introduced GBS and the efficiency of successfully edited single-cell derived clonal lines are shown on the left. Sanger sequencing for a successfully edited clone and the sequence for each allele are shown on the right.

**Figure 2. Genomic insertion of a single GBS results gene-specific acquired GR binding and GR-dependent transcriptional regulation.**

(a-d) Relative mRNA expression levels as determined by qPCR for (a) *GYPC*, (b) *IL1B*, (c) *IL1R2* and (d) *VSIG1* are shown for unedited parental U2OS-GR cells (wt), for unedited clonal control cell lines and for clonal cell lines with an integrated GBS at the target gene as indicated. Averages  $\pm$  standard error of mean (SEM) for cell lines treated overnight with 1  $\mu$ M dexamethasone (dex) or with ethanol (-) as vehicle control are shown. Dots show the values for each individual clonal line. (e-h) GR occupancy at the edited genes was analyzed by chromatin immunoprecipitation (ChIP) followed by qPCR for cells as indicated treated with vehicle control (-) or 1  $\mu$ M dex for 90 min. Average percentage of input precipitated  $\pm$  SEM from three independent experiments is shown for an unedited clonal control cell line and for a clonal cell line edited at either the (e) *GYPC*, (f) *IL1B*, (g) *IL1R2* or (h) *VSIG1* locus. Left panel shows binding at the edited promoter; right panel binding at the unedited *GILZ* locus, which serves as control for comparable ChIP efficiencies between clonal lines.

**Figure 3. Activation of targeted loci by the Cas9 activator dCas9-SAM.**

(Top) Schematic of the dCas9 synergistic activation mediator (dCas9-SAM) targeted to the promoter region of a gene. (Bottom) Fold induction of *GYPC*, *IL1B*, *IL1R2* and *VSIG1* expression upon targeting dCas9-SAM to its transcriptional start site (TSS). The average fold change induced by a gRNA targeted to the promoter region of the respective gene relative to a control non-targeting gRNAs  $\pm$  SEM from three independent experiments is shown.

**Figure 4. Comparison of *IL1R2* activation levels by inserted GBS variants.**

(a) Overview of the *IL1R2* promoter region showing the location of the GBS integration, the sequence of integrated GBS variants, the GR ChIP-seq tag density for dex-treated U2OS-GR cells and the location of a GR peak that is already present at the locus prior to editing (*IL1R2* GR wt peak). (b) Relative mRNA expression levels as determined by qPCR for *IL1R2* and for the unedited control GR target gene *DUSP1* are shown for unedited parental U2OS-GR cells (wt), for unedited clonal control cell lines and for clonal cell lines with an integrated GBS as indicated at the *IL1R2* gene. Averages  $\pm$  SEM for cell lines treated overnight with 1  $\mu$ M dexamethasone



(dex) or with ethanol (-) as vehicle control are shown. Dots show the values for each individual clonal line. **(c)** GR occupancy was analyzed by chromatin immunoprecipitation followed by qPCR for clonal lines as indicated treated with vehicle control (-) or 1  $\mu$ M dex for 90 min. Average percentage of input precipitated  $\pm$  SEM from three independent experiments is shown for the locus where the GBS was inserted (*IL1R2* promoter), the *IL1R2* wt peak, a positive control region (*GILZ*) and a negative control region (*TAT*). **(d)** Relative mRNA expression levels as determined by qPCR for the *IL1R2* gene for unedited parental U2OS-GR cells (wt), for unedited clonal control cell lines and for clonal cell lines with an integrated GBS as indicated at the *IL1R2* gene. Averages  $\pm$  SEM for cell lines treated for 4, 6, 8, or 10 h with 1  $\mu$ M dex or vehicle control (-) is shown. Dots indicate the value of each individual clonal cell line.

**Figure 5. Effect of GBS1 sequence identity on GR-dependent *GILZ* activation.** **(a)** Tracks showing H3K27ac and GR ChIP-seq tag density, ATAC-seq and RNA-seq reads at the *GILZ* locus for U2OS-GR cells treated as indicated. The *GILZ* GBS1 targeted for editing is highlighted in brown and the distance in kilo base pairs (kb) to the next transcription start site (TSS) is indicated. **(b)** Relative *GILZ* mRNA expression is shown for parental U2OS-GR cells, unedited clonal controls and for clonal lines with a deleted GBS1. The average  $\pm$  SEM of at least five clonal cell lines treated overnight with 1  $\mu$ M dex or vehicle control (-) is shown. Dots show the values for each individual clonal line. **(c)** DNA sequence of GBS variants analyzed. **(d)** Relative fold activation of luciferase reporters with GBS variants as indicated comparing cell treated with vehicle control (etoh) and cells treated overnight with 1  $\mu$ M dex. Averages  $\pm$  SEM from three independent experiments are shown. **(e)** Relative mRNA expression levels as determined by qPCR for *GILZ* and for the unedited control GR target gene *DUSP1* are shown for unedited parental U2OS-GR cells (wt), for unedited clonal control cell lines and for clonal cell lines with GBS variant as indicated at the *GILZ* GBS1 gene. Averages  $\pm$  SEM for cell lines treated overnight with 1  $\mu$ M dexamethasone (dex) or with ethanol (-) as vehicle control are shown. Dots show the values for each individual clonal line. **(f)** Same as for (e) except that *GILZ* mRNA levels are shown for cells treated overnight with 0.1 nM dex, 10 nM dex or vehicle control (-). **(g)** Same as for (e) except that cells were treated for either 0.5, 1, 2 or 4 h with 1  $\mu$ M dex.

### Supplementary Figure Legends

**Figure S1. Genotyping results for U2OS-GR clonal lines with an inserted promoter-proximal GBS (CGT).** **(a)** Genotyping of CGT insertion at the *GYPC* gene. Top: The sequence of the gRNA, the introduced GBS and the efficiency of successfully edited single-cell derived clonal lines. Bottom: Sanger sequencing results for a successfully edited clonal line and the inferred sequence for each allele. **(b)** Genotyping of clones with a successfully added CGT GBS at the *IL1B* gene. **(c)** Genotyping of clones with a successfully added CGT GBS at the *IL1R2* gene. **(d)** Genotyping of clones with a successfully added CGT GBS at the *VSIG1* gene.

**Figure S2. Genotyping results for U2OS-GR clonal lines with different inserted GBS variants at the *IL1R2* gene.** (a) Results for GILZ GBS insertion at the *IL1R2* gene. (b) Results for FKBP5-2 GBS insertion at the *IL1R2* gene. (c) Results for PAL GBS insertion at the *IL1R2* gene.

**Figure S3. Genotyping results for U2OS-GR clonal lines with different GBS variants replacing the endogenous *GILZ* GBS1.** (a) Results for clonal lines with *GILZ* GBS1 changed to the FKBP5-2 GBS variant. (b) Results for clonal lines with *GILZ* GBS1 changed to the PAL GBS variant.

**Figure S4. Induction of the unedited *DUSP1* control gene by clonal lines edited at the *IL1R2* locus.** Relative mRNA expression levels as determined by qPCR for the unedited *DUSP1* gene for unedited parental U2OS-GR cells (wt), for unedited clonal control cell lines and for clonal cell lines with an integrated GBS as indicated at the *IL1R2* gene. Averages  $\pm$  SEM for cell lines treated for 4, 6, 8, or 10 h with 1  $\mu$ M dex or vehicle control (-) is shown. Dots indicate the value of each individual clonal cell line.

**Figure S5. Induction of control genes for clonal lines edited at the *GILZ* GBS1** (a) Relative mRNA expression levels as determined by qPCR for the unedited control GR target gene *FKBP5* are shown for unedited parental U2OS-GR cells (wt), for unedited clonal control cell lines and for clonal cell lines with GBS variants as indicated at the *GILZ* GBS1 locus. Averages  $\pm$  SEM for cell lines treated overnight with 0.1 nM dex, 10 nM dex or vehicle control (-) control are shown. Dots show the values for each individual clonal line. (b) Same as for (a) except that clonal lines as indicated were treated for either 0.5, 1, 2 or 4 h with 1  $\mu$ M dex and expression of the unedited *DUSP1* control gene is shown.

## References

1. Heinz S, Romanoski CE, Benner C, & Glass CK (2015) The selection and function of cell type-specific enhancers. *Nature reviews. Molecular cell biology* 16(3):144-154.
2. Mack KL & Nachman MW (2017) Gene Regulation and Speciation. *Trends in genetics : TIG* 33(1):68-80.
3. Villar D, Flicek P, & Odom DT (2014) Evolution of transcription factor binding in metazoans - mechanisms and functional implications. *Nature reviews. Genetics* 15(4):221-233.
4. Love MI, *et al.* (2017) Role of the chromatin landscape and sequence in determining cell type-specific genomic glucocorticoid receptor binding and gene regulation. *Nucleic acids research* 45(4):1805-1819.
5. John S, *et al.* (2009) Kinetic complexity of the global response to glucocorticoid receptor action. *Endocrinology* 150(4):1766-1774.
6. Gertz J, *et al.* (2013) Distinct properties of cell-type-specific and shared transcription factor binding sites. *Molecular cell* 52(1):25-36.
7. John S, *et al.* (2011) Chromatin accessibility pre-determines glucocorticoid receptor binding patterns. *Nature genetics* 43(3):264-268.
8. Rao NA, *et al.* (2011) Coactivation of GR and NFKB alters the repertoire of their binding sites and target genes. *Genome research* 21(9):1404-1416.

9. Oh KS, *et al.* (2017) Anti-Inflammatory Chromatinscape Suggests Alternative Mechanisms of Glucocorticoid Receptor Action. *Immunity* 47(2):298-309 e295.
10. Meijssing SH, *et al.* (2009) DNA binding site sequence directs glucocorticoid receptor structure and activity. *Science* 324(5925):407-410.
11. Schone S, *et al.* (2016) Sequences flanking the core-binding site modulate glucocorticoid receptor structure and activity. *Nature communications* 7:12621.
12. Reddy TE, *et al.* (2009) Genomic determination of the glucocorticoid response reveals unexpected mechanisms of gene regulation. *Genome research* 19(12):2163-2171.
13. Thormann V, *et al.* (2018) Genomic dissection of enhancers uncovers principles of combinatorial regulation and cell type-specific wiring of enhancer-promoter contacts. *Nucleic acids research* 46(6):2868-2882.
14. Vockley CM, *et al.* (2016) Direct GR Binding Sites Potentiate Clusters of TF Binding across the Human Genome. *Cell* 166(5):1269-1281 e1219.
15. Klein JC, Chen W, Gasperini M, & Shendure J (2018) Identifying Novel Enhancer Elements with CRISPR-Based Screens. *ACS chemical biology* 13(2):326-332.
16. D'Ippolito AM, *et al.* (2018) Pre-established Chromatin Interactions Mediate the Genomic Response to Glucocorticoids. *Cell systems* 7(2):146-160 e147.
17. Konermann S, *et al.* (2015) Genome-scale transcriptional activation by an engineered CRISPR-Cas9 complex. *Nature* 517(7536):583-588.
18. Chavez A, *et al.* (2016) Comparison of Cas9 activators in multiple species. *Nature methods* 13(7):563-567.
19. Kwart D, Paquet D, Teo S, & Tessier-Lavigne M (2017) Precise and efficient scarless genome editing in stem cells using CORRECT. *Nature protocols* 12(2):329-354.
20. Hsu PD, *et al.* (2013) DNA targeting specificity of RNA-guided Cas9 nucleases. *Nature biotechnology* 31(9):827-832.
21. Rogatsky I, Trowbridge JM, & Garabedian MJ (1997) Glucocorticoid receptor-mediated cell cycle arrest is achieved through distinct cell-specific transcriptional regulatory mechanisms. *Molecular and cellular biology* 17(6):3181-3193.
22. Buenrostro JD, Giresi PG, Zaba LC, Chang HY, & Greenleaf WJ (2013) Transposition of native chromatin for fast and sensitive epigenomic profiling of open chromatin, DNA-binding proteins and nucleosome position. *Nature methods* 10(12):1213-1218.
23. Watson LC, *et al.* (2013) The glucocorticoid receptor dimer interface allosterically transmits sequence-specific DNA signals. *Nature structural & molecular biology* 20(7):876-883.
24. Weingarten-Gabbay S & Segal E (2014) The grammar of transcriptional regulation. *Human genetics* 133(6):701-711.
25. Strahle U, Schmid W, & Schutz G (1988) Synergistic action of the glucocorticoid receptor with transcription factors. *The EMBO journal* 7(11):3389-3395.
26. Jubb AW, Young RS, Hume DA, & Bickmore WA (2016) Enhancer Turnover Is Associated with a Divergent Transcriptional Response to Glucocorticoid in Mouse and Human Macrophages. *Journal of immunology* 196(2):813-822.
27. Bain DL, *et al.* (2012) Glucocorticoid receptor-DNA interactions: binding energetics are the primary determinant of sequence-specific transcriptional activity. *Journal of molecular biology* 422(1):18-32.
28. McDowell IC, *et al.* (2018) Glucocorticoid receptor recruits to enhancers and drives activation by motif-directed binding. *Genome research* 28(9):1272-1284.

29. DeKever RC, *et al.* (2010) Functional genomics, proteomics, and regulatory DNA analysis in isogenic settings using zinc finger nuclease-driven transgenesis into a safe harbor locus in the human genome. *Genome research* 20(8):1133-1142.
30. Verfaillie A, *et al.* (2016) Multiplex enhancer-reporter assays uncover unsophisticated TP53 enhancer logic. *Genome research* 26(7):882-895.
31. Wang JC, *et al.* (2004) Chromatin immunoprecipitation (ChIP) scanning identifies primary glucocorticoid receptor target genes. *Proceedings of the National Academy of Sciences of the United States of America* 101(44):15603-15608.
32. Schone S, *et al.* (2018) Synthetic STARR-seq reveals how DNA shape and sequence modulate transcriptional output and noise. *PLoS genetics* 14(11):e1007793.
33. Corces MR, *et al.* (2017) An improved ATAC-seq protocol reduces background and enables interrogation of frozen tissues. *Nature methods* 14(10):959-962.
34. Langmead B & Salzberg SL (2012) Fast gapped-read alignment with Bowtie 2. *Nature methods* 9(4):357-359.
35. Li H, *et al.* (2009) The Sequence Alignment/Map format and SAMtools. *Bioinformatics* 25(16):2078-2079.
36. Ramirez F, Dundar F, Diehl S, Gruning BA, & Manke T (2014) deepTools: a flexible platform for exploring deep-sequencing data. *Nucleic acids research* 42(Web Server issue):W187-191.
37. Dobin A, *et al.* (2013) STAR: ultrafast universal RNA-seq aligner. *Bioinformatics* 29(1):15-21.

## Tables:

**Table 1.** Primer sequences for SDM of luciferase reporter constructs and HDR templates

| Name                               | Sequence 5' to 3'                                                                         |
|------------------------------------|-------------------------------------------------------------------------------------------|
| <i>GILZ</i> wt GBS to FKBP5-2      | CAGGACCAAAGGAGAACATCCTGTGCCACCACATATAC<br>GTATATGTGGTGGCACAGGATGTTCTCCTTTGGTCCTG          |
| <i>GILZ</i> wt GBS to PAL          | CAGGACCAAAGGAGAACAAAATGTTCTACCACATATAC<br>GTATATGTGGTAGAACATTTTGTTCCTTTGGTCCTG            |
| <i>IL1R2</i> intro CGT GBS         | TACTCAGACCCAGCAGAACATTTTGTACGTGCTCCCCGTGAG<br>CTCACGGGGAGCAGTACAAAATGTTCTGCTGGGTCTGAGTA   |
| <i>IL1R2</i> intro PAL GBS         | TACTCAGACCCAGCAGAACAAAATGTTCTTGTCTCCCCGTGAG<br>CTCACGGGGAGCAAGAACATTTTGTTCGCTGGGTCTGAGTA  |
| <i>IL1R2</i> intro FKBP5-2<br>GBS  | TACTCAGACCCAGCAGAACATCCTGTGCCCTGCTCCCCGTGAG<br>CTCACGGGGAGCAGGCACAGGATGTTCTGCTGGGTCTGAGTA |
| <i>IL1R2</i> intro <i>GILZ</i> GBS | TACTCAGACCCAGCAGAACATTTGGTTCTGCTCCCCGTGAG<br>CTCACGGGGAGCAGGAACCAATGTTCTGCTGGGTCTGAGTA    |
| <i>GYPE</i> intro CGT GBS          | AATTCTCAACCAGAACATTTTGTACGGGTAG<br>CTACCCGTACAAAATGTTCTGGTTGAGAATT                        |
| <i>IL1B</i> intro CGT GBS          | GGTTTGGTATCAGAACATTTTGTACGCGCTG<br>CAGCGCGTACAAAATGTTCTGATACCAAACC                        |
| <i>VSIG1</i> intro CGT GBS         | TTATTAACACAGTAAGAACATTTTGTACGAAACACGCC<br>GGCGTGTTCGTACAAAATGTTCTTACTGTGTTAATAA           |

**Table 2.** Primer sequences for the quantification of GR-binding in ChIP experiments

| Name                      | Sequence 5' to 3'                               |
|---------------------------|-------------------------------------------------|
| <i>IL1R2</i> promoter     | AAAAATAGGGAAACTTATGCGGC<br>ACCTTTTCCTCCTCACGGG  |
| <i>IL1R2</i> wt GR-peak   | TGCAATAAACATCCTGGGTGA<br>GTGTCCACCACCAATAGCAC   |
| pos. ctrl ( <i>GILZ</i> ) | AACTCAGCAGCTTTTCTTCGT<br>AACCAAGGAATTGGGTACAT   |
| neg. ctrl ( <i>TAT</i> )  | AATGGCAGCCCCTAGTCATTC<br>AACTGGGAGTGATACTGGTTCC |

**Table 3.** Primer sequences for the quantification of H3K27Ac in ChIP experiments

| Name                      | Sequence 5' to 3'                                 |
|---------------------------|---------------------------------------------------|
| <i>IL1R2</i> promoter     | AAAAATAGGGAAACTTATGCGGC<br>ACCTTTTCCTCCTCACGGG    |
| <i>IL1R2</i> wt GR-peak   | TGCAATAAACATCCTGGGTGA<br>GTGTCCACCACCAATAGCAC     |
| pos. Ctrl ( <i>SYN2</i> ) | AGGAATATTTGCTGACACTTCCA<br>ACAGCACCTACCATATAGGCTT |
| neg. ctrl ( <i>TAT</i> )  | AATGGCAGCCCCTAGTCATTC<br>AACTGGGAGTGATACTGGTTCC   |

**Table 4.** Genomic region spanned by HDR templates

| <b>Gene</b>  | <b>Location (GRCh37/hg19)</b> |
|--------------|-------------------------------|
| <i>GILZ</i>  | ChrX:106,960,177-106,962,953  |
| <i>IL1R2</i> | Chr2:102,606,778-102,609,287  |
| <i>GYPE</i>  | Chr2:127,412,437-127,414,329  |
| <i>IL1B</i>  | Chr2:113,593,542-113,595,924  |
| <i>VSIG1</i> | ChrX:107,287,118-107,289,154  |

**Table 5.** Location of GBS introduction

| <b>Gene</b>  | <b>Location (GRCh37/hg19)</b> |
|--------------|-------------------------------|
| <i>GILZ</i>  | ChrX:106,961,576-106,961,591  |
| <i>IL1R2</i> | Chr2:102,608,286-102,608,301  |
| <i>GYPE</i>  | Chr2:127,413,491-127,413,506  |
| <i>IL1B</i>  | Chr2:113,594,360-113,594,375  |
| <i>VSIG1</i> | ChrX:107,288,135-107,288,150  |

**Table 6.** gRNA sequences for gene editing and activation by dCas9-SAM

| <b>Name</b>  | <b>Sequence 5' to 3'</b> | <b>PAM</b> |
|--------------|--------------------------|------------|
| <i>GILZ</i>  | CAGGACCAAAGGAGAACATT     | <u>GGG</u> |
| <i>IL1R2</i> | GACCCAGCACTGCAGCCTGG     | <u>GGG</u> |
| <i>GYPE</i>  | TCAACCACAACCTCTGTATC     | <u>CGG</u> |
| <i>IL1B</i>  | GAAAGCCATAAAAACAGCGA     | <u>GGG</u> |
| <i>VSIG1</i> | ACACAGTAGCAAATATATCA     | <u>AGG</u> |

**Table 7.** Primer sequences for the quantification of gene expression

| <b>Name</b>          | <b>Sequence 5' to 3'</b>                          |
|----------------------|---------------------------------------------------|
| <i>DUSP1</i>         | CTGCCTTGATCAACGTCTCA<br>GTCTGCCTTGTGGTTGTCCT      |
| <i>FKBP5</i>         | TGAAGGGTTAGCGGAGCAC<br>CTTGGCACCTTCATCAGTAGTC     |
| <i>GILZ</i>          | CCATGGACATCTTCAACAGC<br>TTGGCTCAATCTCTCCCATC      |
| <i>IL1R2</i> exon1-2 | CAGGTGAGCAGCAACAAGG<br>TGCTCCTGACAACTTCCAGA       |
| <i>IL1R2</i> exon8-9 | TTTTTCAGACACTACGCACCA<br>GATGAGGCCATAGCACAGT      |
| <i>GYPE</i>          | TCCAGGGATGTCTGGATGG<br>CGAAGAGGAGGGAGACTAGG       |
| <i>IL1B</i>          | CCACAGACCTTCCAGGAGAATG<br>GTGCAGTTCAGTGATCGTACAGG |
| <i>VSIG1</i>         | AGCCAATTTCTCACAGCTCG<br>AAGTAAATCTCAGAGGTCCAGC    |
| <i>RPL19</i>         | ATGTATCACAGCCTGTACCTG<br>TTCTTGGTCTCTTCCTCCTTG    |



## Main Figures (1-5)

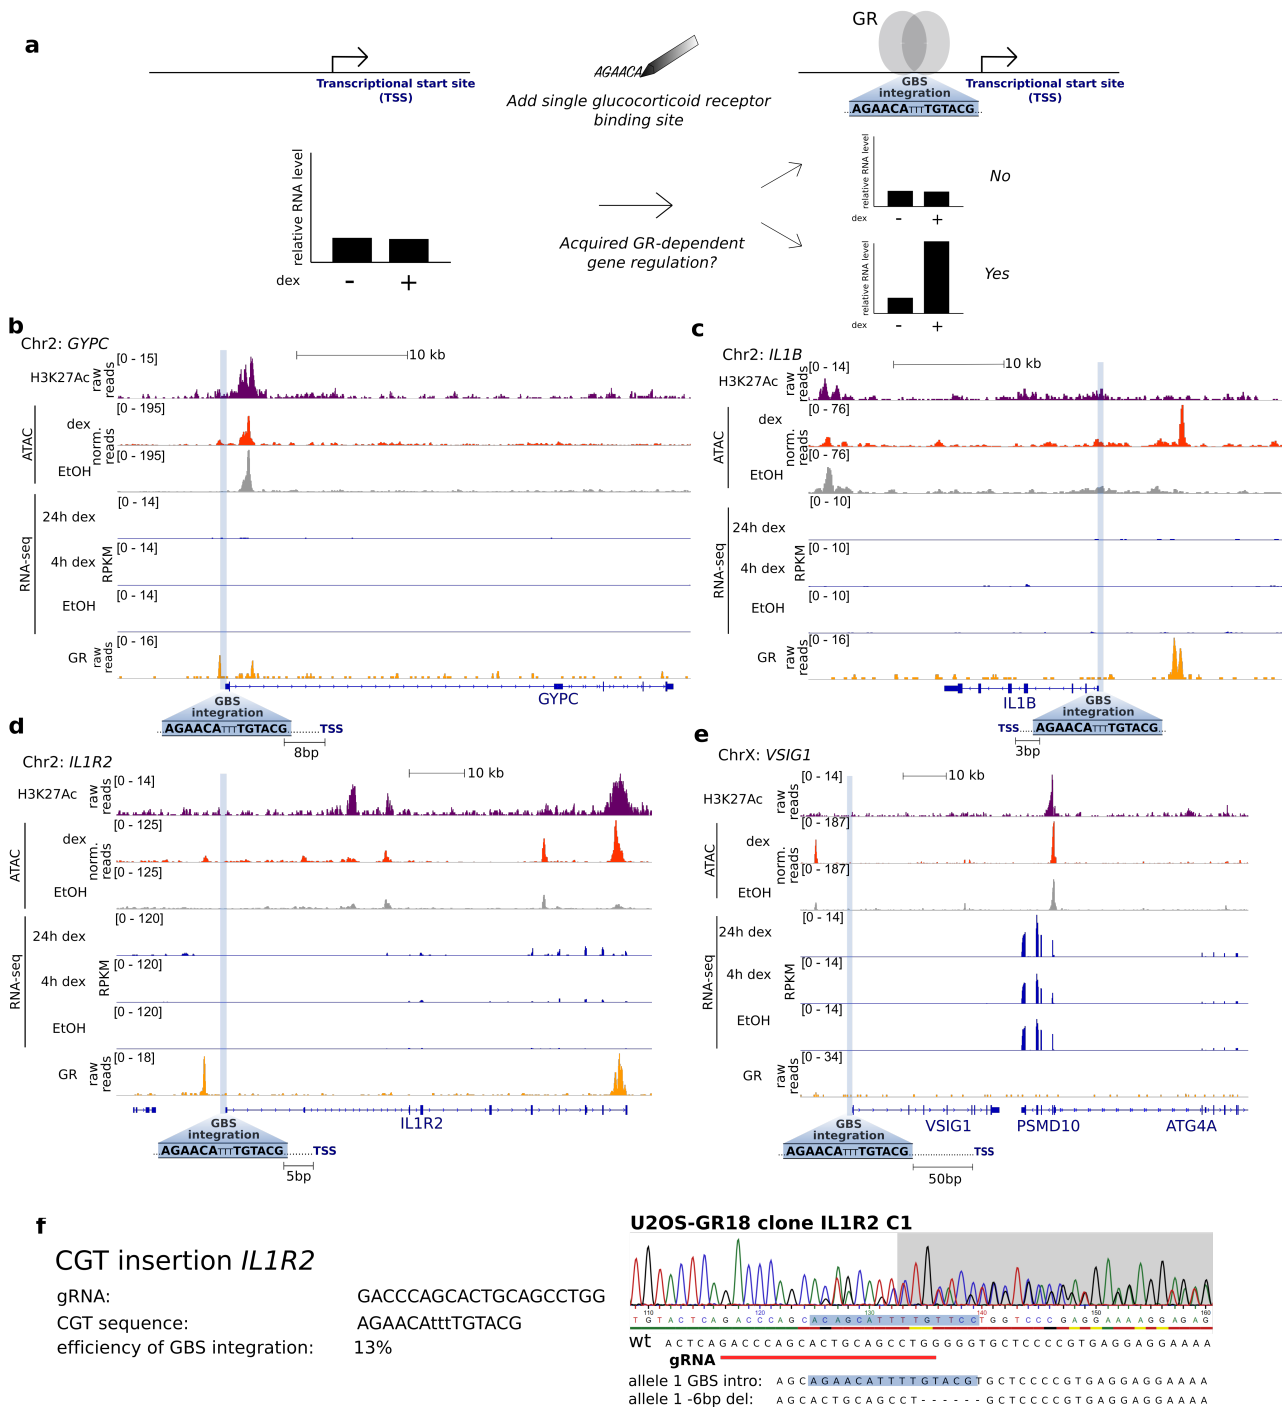

**Figure 1. Genes selected for genomic GBS integration at the respective promoter region.** (a) Overview of the experimental design of our study. (b-e) Tracks showing H3K27ac and GR ChIP-seq normalized tag density, ATAC-seq and RNA-seq reads for U2OS-GR cells treated as indicated. Genomic regions surrounding the loci of GBS integration are shown for *GYPC* (b), *IL1B* (c), *IL1R2* (d) and *VSIG1* (e). The genomic site targeted for GBS integration is highlighted in blue and its distance in base pairs (bp) to the transcription start site (TSS) is indicated. (f) Homology directed repair (HDR)-mediated genome editing to introduce the CGT GBS upstream of the *IL1R2* gene. The sequence of the gRNA, the sequence of the introduced GBS and the efficiency of successfully edited single-cell derived clonal lines are shown on the left. Sanger sequencing for a successfully edited clone and the sequence for each allele are shown on the right.

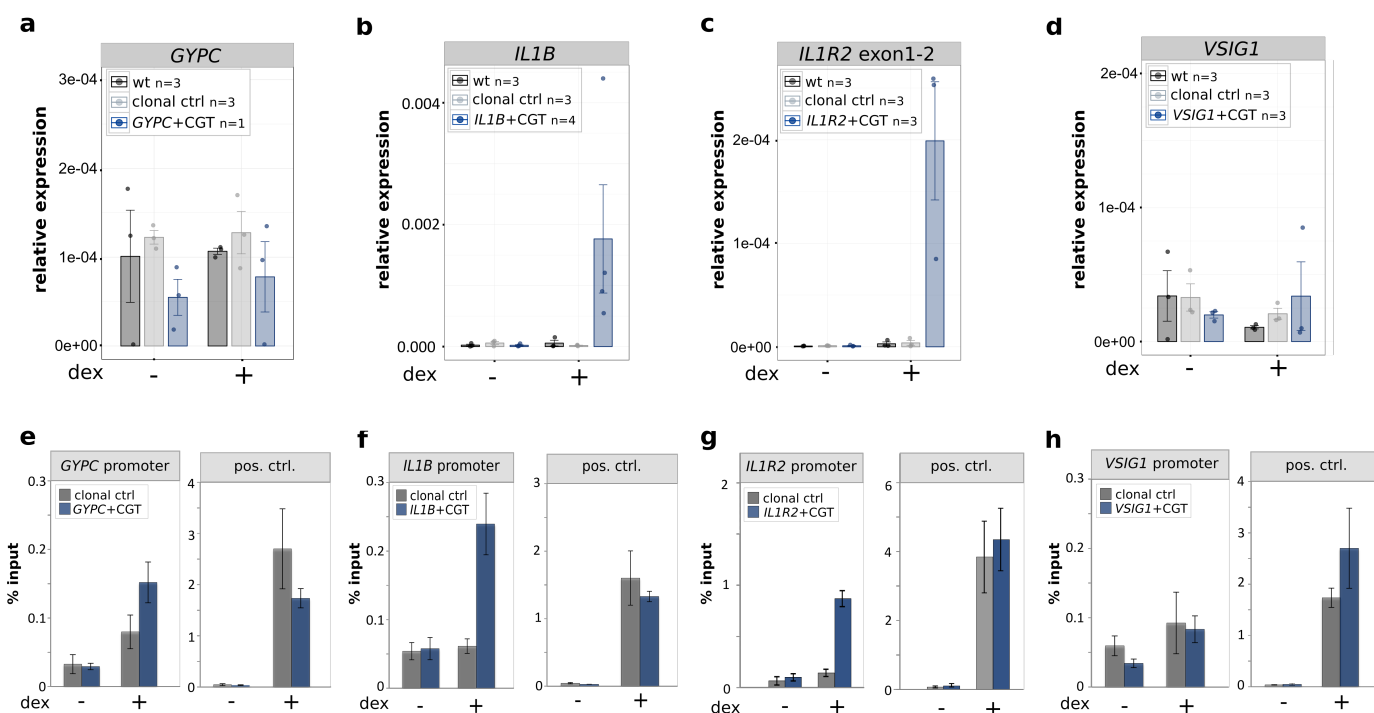

**Figure 2. Genomic insertion of a single GBS results gene-specific acquired GR binding and GR-dependent transcriptional regulation.** (a-d) Relative mRNA expression levels as determined by qPCR for (a) *GYPC*, (b) *IL1B*, (c) *IL1R2* and (d) *VSIG1* are shown for unedited parental U2OS-GR cells (wt), for unedited clonal control cell lines and for clonal cell lines with an integrated GBS at the target gene as indicated. Averages  $\pm$  standard error of mean (SEM) for cell lines treated overnight with 1  $\mu$ M dexamethasone (dex) or with ethanol (-) as vehicle control are shown. Dots show the values for each individual clonal line. (e-h) GR occupancy at the edited genes was analyzed by chromatin immunoprecipitation (ChIP) followed by qPCR for cells as indicated treated with vehicle control (-) or 1  $\mu$ M dex for 90 min. Average percentage of input precipitated  $\pm$  SEM from three independent experiments is shown for an unedited clonal control cell line and for a clonal cell line edited at either the (e) *GYPC*, (f) *IL1B*, (g) *IL1R2* or (h) *VSIG1* locus. Left panel shows binding at the edited promoter; right panel binding at the unedited *GILZ* locus, which serves as control for comparable ChIP efficiencies between clonal lines.



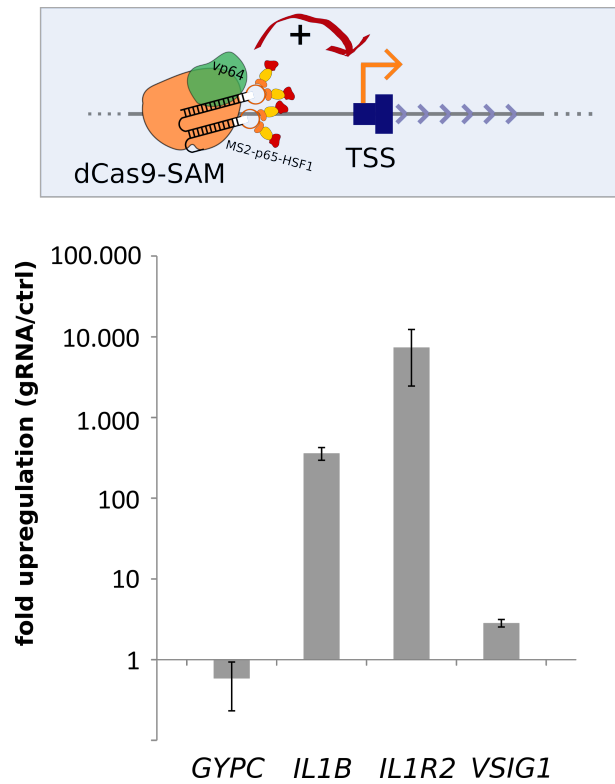

**Figure 3. Activation of targeted loci by the Cas9 activator dCas9-SAM.** (Top) Schematic of the dCas9 synergistic activation mediator (dCas9-SAM) targeted to the promoter region of a gene. (Bottom) Fold induction of *GYPC*, *IL1B*, *IL1R2* and *VSIG1* expression upon targeting dCas9-SAM to its transcriptional start site (TSS). The average fold change induced by a gRNA targeted to the promoter region of the respective gene relative to a control non-targeting gRNAs  $\pm$  SEM from three independent experiments is shown.

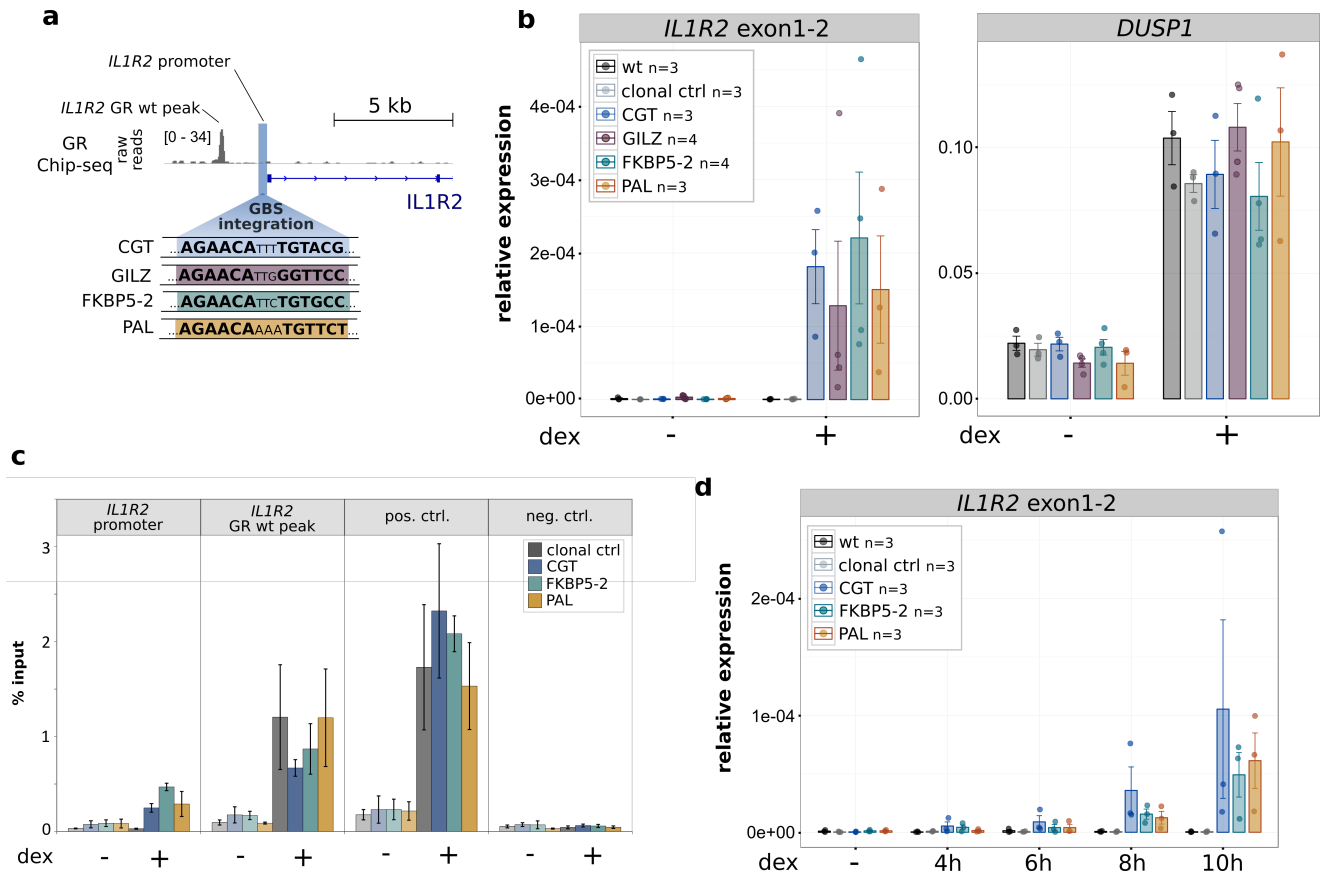

**Figure 4. Comparison of *IL1R2* activation levels by inserted GBS variants.** (a) Overview of the *IL1R2* promoter region showing the location of the GBS integration, the sequence of integrated GBS variants, the GR ChIP-seq tag density for dex-treated U2OS-GR cells and the location of a GR peak that is already present at the locus prior to editing (*IL1R2* GR wt peak). (b) Relative mRNA expression levels as determined by qPCR for *IL1R2* and for the unedited control GR target gene *DUSP1* are shown for unedited parental U2OS-GR cells (wt), for unedited clonal control cell lines and for clonal cell lines with an integrated GBS as indicated at the *IL1R2* gene. Averages  $\pm$  SEM for cell lines treated overnight with 1  $\mu$ M dexamethasone (dex) or with ethanol (-) as vehicle control are shown. Dots show the values for each individual clonal line. (c) GR occupancy was analyzed by chromatin immunoprecipitation followed by qPCR for clonal lines as indicated treated with vehicle control (-) or 1  $\mu$ M dex for 90 min. Average percentage of input precipitated  $\pm$  SEM from three independent experiments is shown for the locus where the GBS was inserted (*IL1R2* promoter), the *IL1R2* wt peak, a positive control region (*GILZ*) and a negative control region (*TAT*). (d) Relative mRNA expression levels as determined by qPCR for the *IL1R2* gene for unedited parental U2OS-GR cells (wt), for unedited clonal control cell lines and for clonal cell lines with an integrated GBS as indicated at the *IL1R2* gene. Averages  $\pm$  SEM for cell lines treated for 4, 6, 8, or 10 h with 1  $\mu$ M dex or vehicle control (-) is shown. Dots indicate the value of each individual clonal cell line.

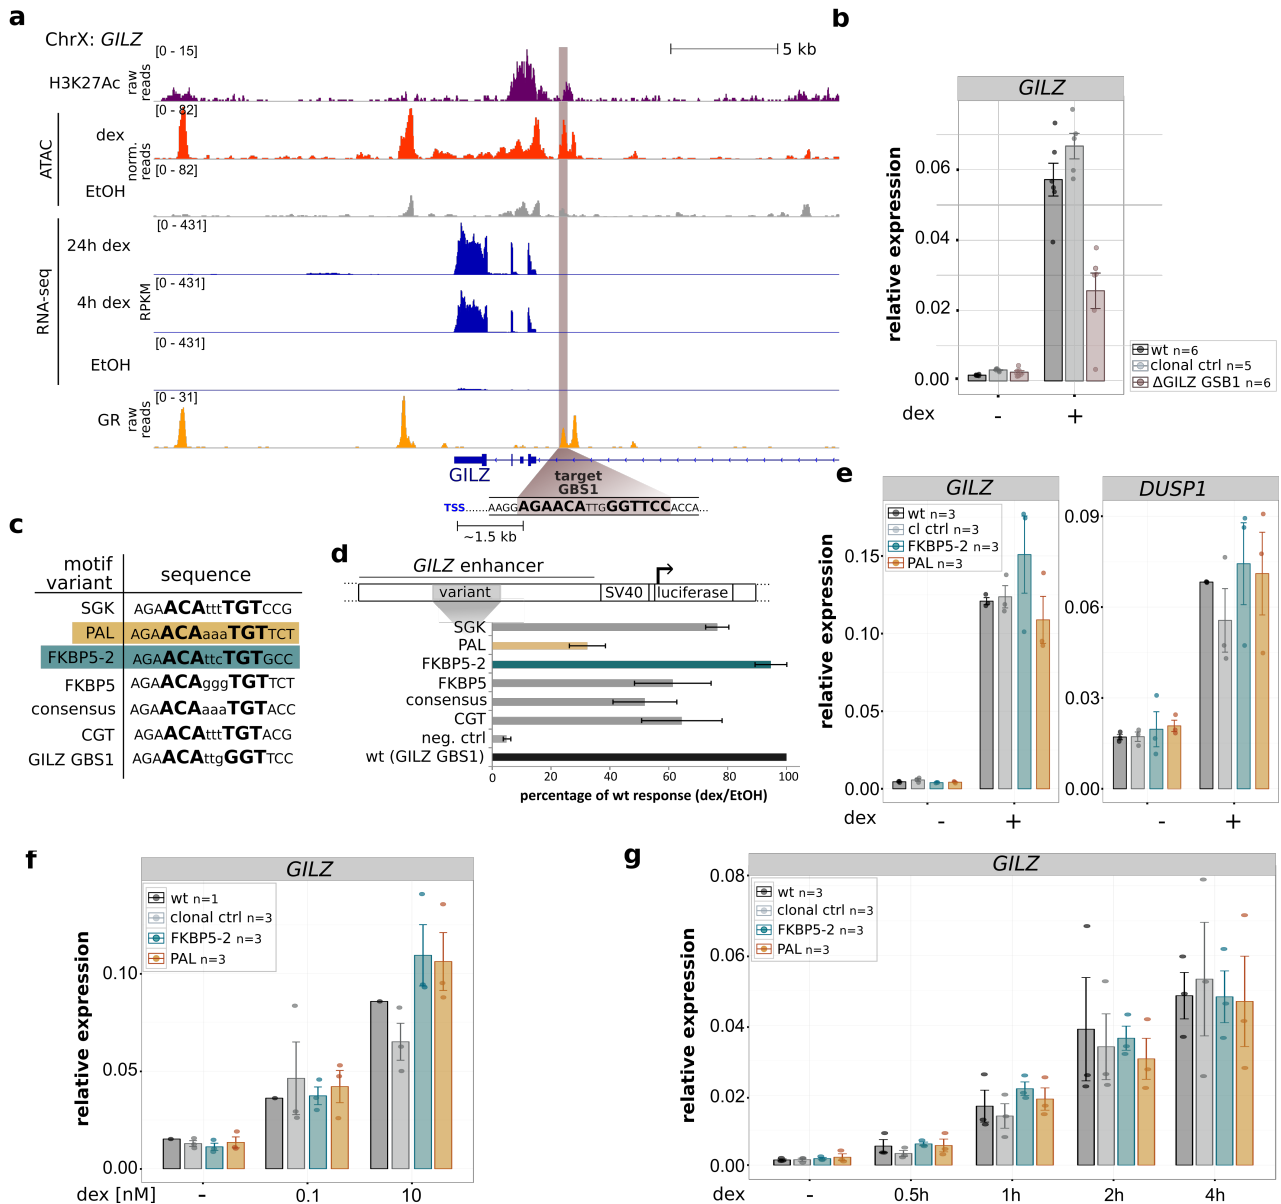

**Figure 5. Effect of GBS1 sequence identity on GR-dependent *GILZ* activation.** (a) Tracks showing H3K27ac and GR ChIP-seq tag density, ATAC-seq and RNA-seq reads at the *GILZ* locus for U2OS-GR cells treated as indicated. The *GILZ* GBS1 targeted for editing is highlighted in brown and the distance in kilo base pairs (kb) to the next transcription start site (TSS) is indicated. (b) Relative *GILZ* mRNA expression is shown for parental U2OS-GR cells, unedited clonal controls and for clonal lines with a deleted GBS1. The average  $\pm$  SEM of at least five clonal cell lines treated overnight with 1  $\mu$ M dex or vehicle control (-) is shown. Dots show the values for each individual clonal line. (c) DNA sequence of GBS variants analyzed. (d) Relative fold activation of luciferase reporters with GBS variants as indicated comparing cell treated with vehicle control (etoh) and cells treated overnight with 1  $\mu$ M dex. Averages  $\pm$  SEM from three independent experiments are shown. (e) Relative mRNA expression levels as determined by qPCR for *GILZ* and for the unedited control GR target gene *DUSP1* are shown for unedited parental U2OS-GR cells (wt), for unedited clonal control cell lines and for clonal cell lines with GBS variant as indicated at the *GILZ* GBS1 gene. Averages  $\pm$  SEM for cell lines treated overnight with 1  $\mu$ M dexamethasone (dex) or with ethanol (-) as vehicle control are shown. Dots show the values for each individual clonal line. (f) Same as for (e) except that *GILZ* mRNA levels are shown for cells treated overnight with 0.1 nM dex, 10 nM dex or vehicle control (-). (g) Same as for (e) except that cells were treated for either 0.5, 1, 2 or 4 h with 1  $\mu$ M dex.

## Supplementary Figures (1-5)

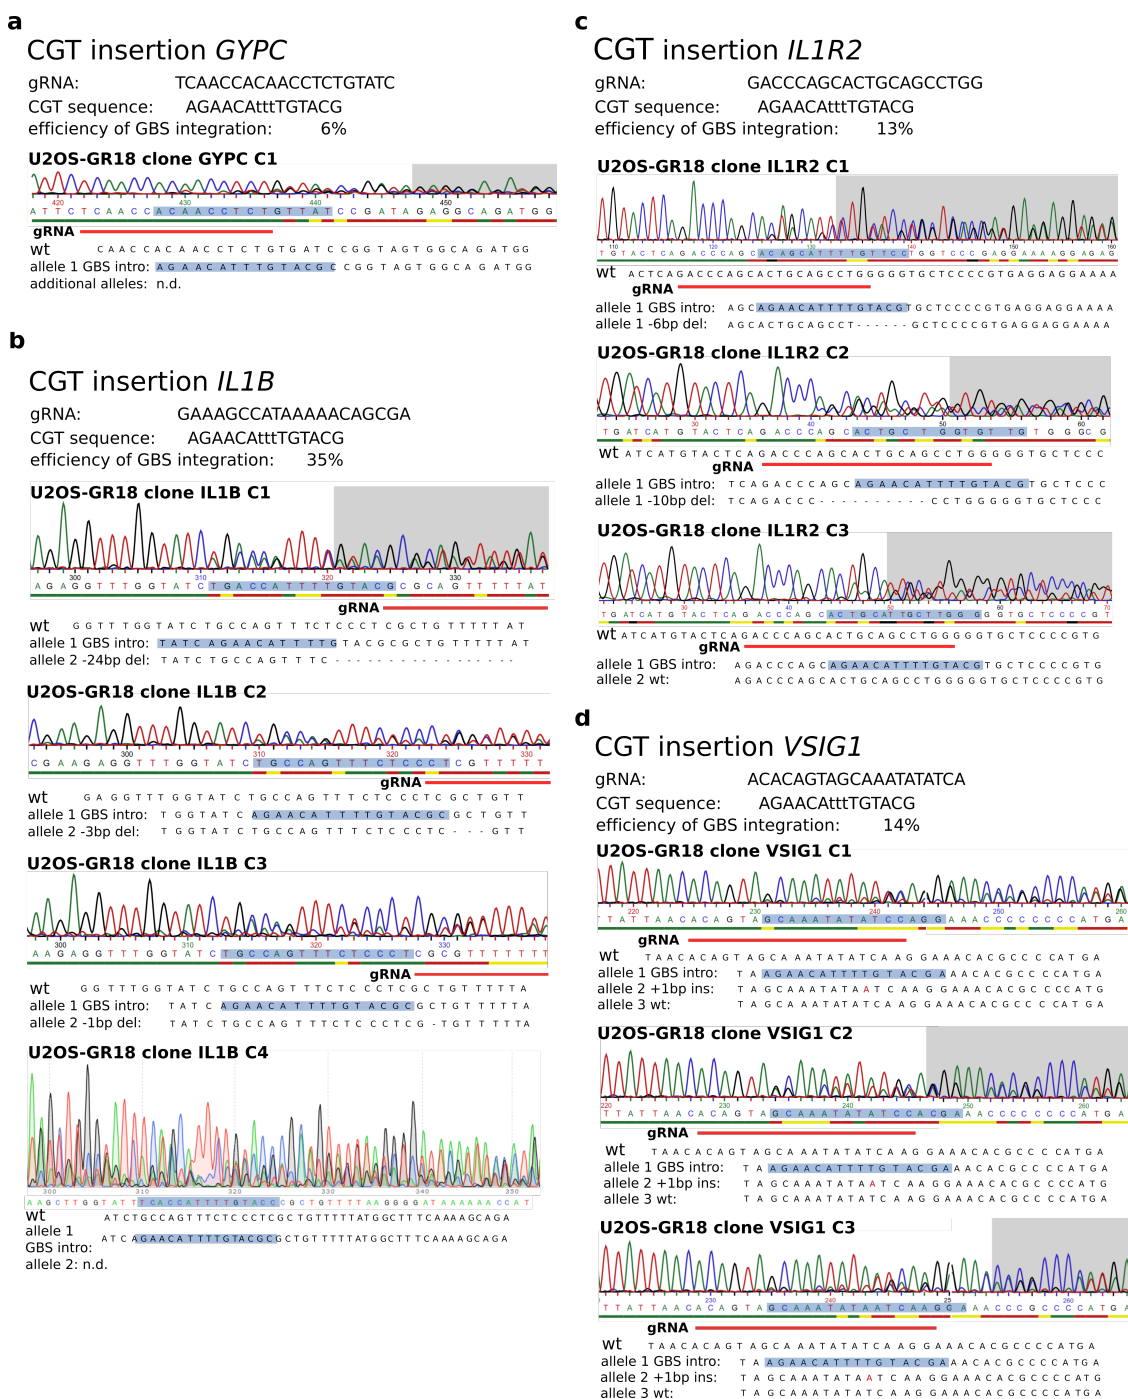

**Figure S1. Genotyping results for U2OS-GR clonal lines with an inserted promoter-proximal GBS (CGT).** (a) Genotyping of CGT insertion at the *GYPC* gene. Top: The sequence of the gRNA, the introduced GBS and the efficiency of successfully edited single-cell derived clonal lines. Bottom: Sanger sequencing results for a successfully edited clonal line and the inferred sequence for each allele. (b) Genotyping of clones with a successfully added CGT GBS at the *IL1B* gene. (c) Genotyping of clones with a successfully added CGT GBS at the *IL1R2* gene. (d) Genotyping of clones with a successfully added CGT GBS at the *VSIG1* gene.

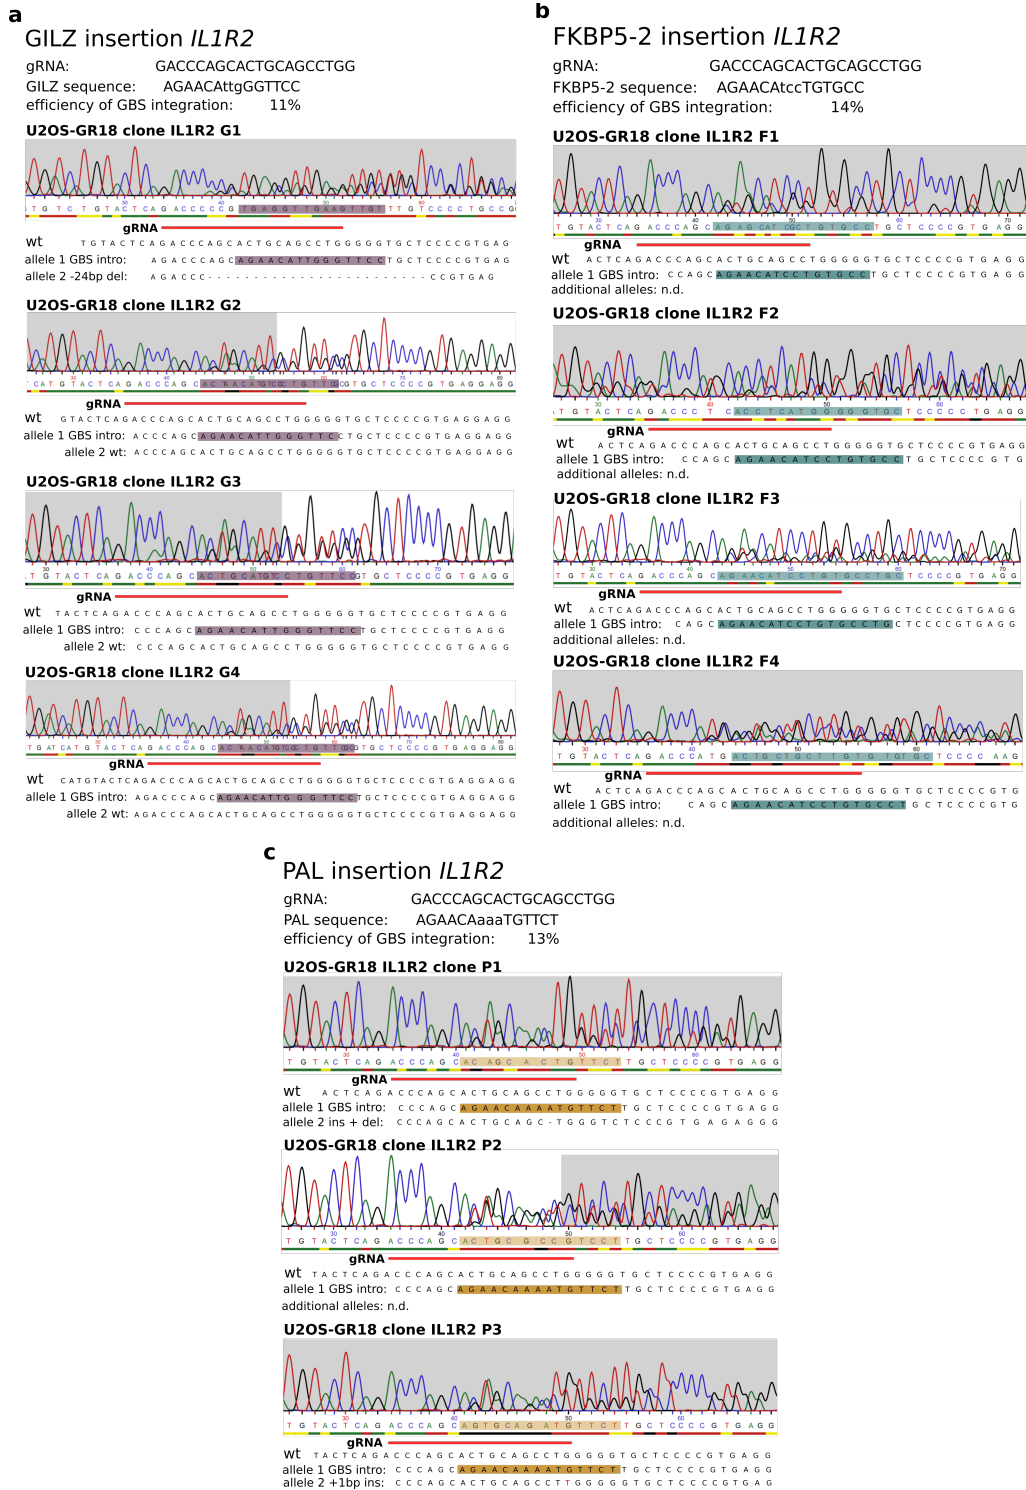

**Figure S2. Genotyping results for U2OS-GR clonal lines with different inserted GBS variants at the *IL1R2* gene. (a) Results for GILZ GBS insertion at the *IL1R2* gene. (b) Results for FKBP5-2 GBS insertion at the *IL1R2* gene. (c) Results for PAL GBS insertion at the *IL1R2* gene.**

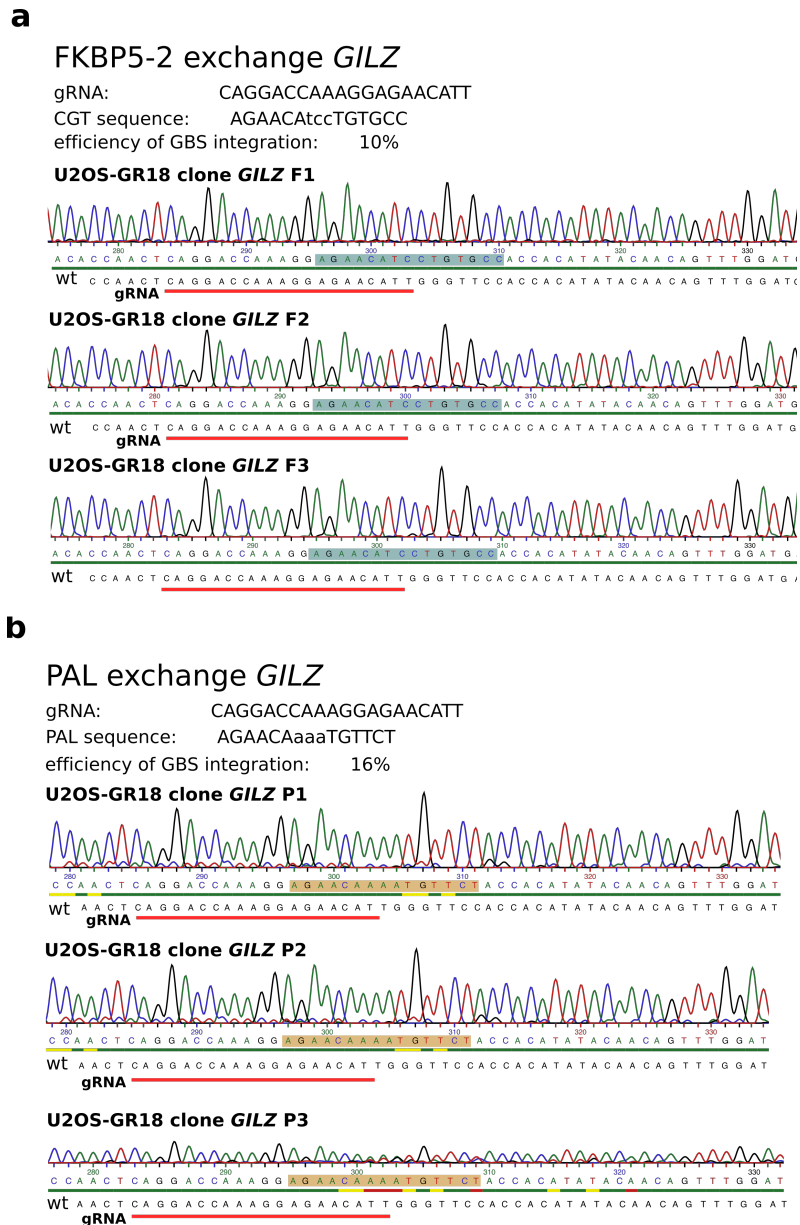

**Figure S3. Genotyping results for U2OS-GR clonal lines with different GBS variants replacing the endogenous *GILZ* GBS1. (a) Results for clonal lines with *GILZ* GBS1 changed to the FKBP5-2 GBS variant. (b) Results for clonal lines with *GILZ* GBS1 changed to the PAL GBS variant.**

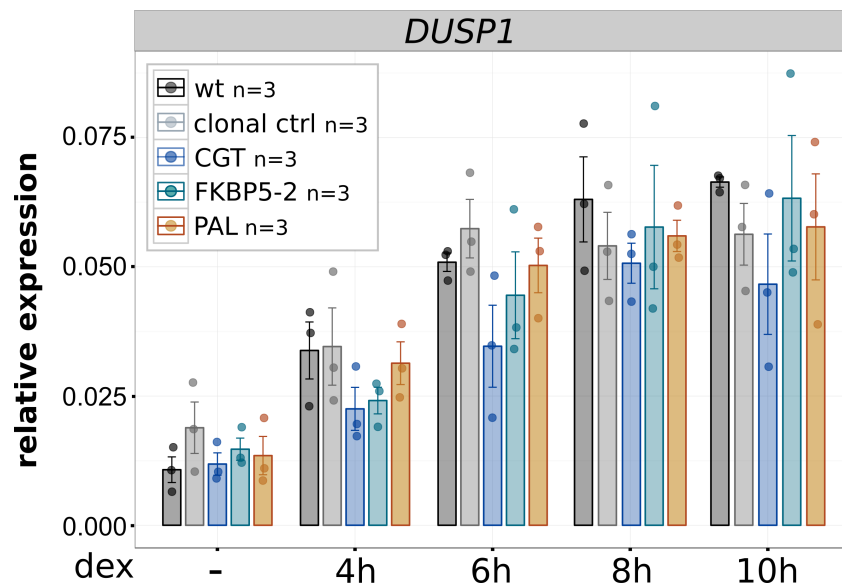

**Figure S4. Induction of the unedited *DUSP1* control gene by clonal lines edited at the *IL1R2* locus.** Relative mRNA expression levels as determined by qPCR for the unedited *DUSP1* gene for unedited parental U2OS-GR cells (wt), for unedited clonal control cell lines and for clonal cell lines with an integrated GBS as indicated at the *IL1R2* gene. Averages  $\pm$  SEM for cell lines treated for 4, 6, 8, or 10 h with 1  $\mu$ M dex or vehicle control (-) is shown. Dots indicate the value of each individual clonal cell line.

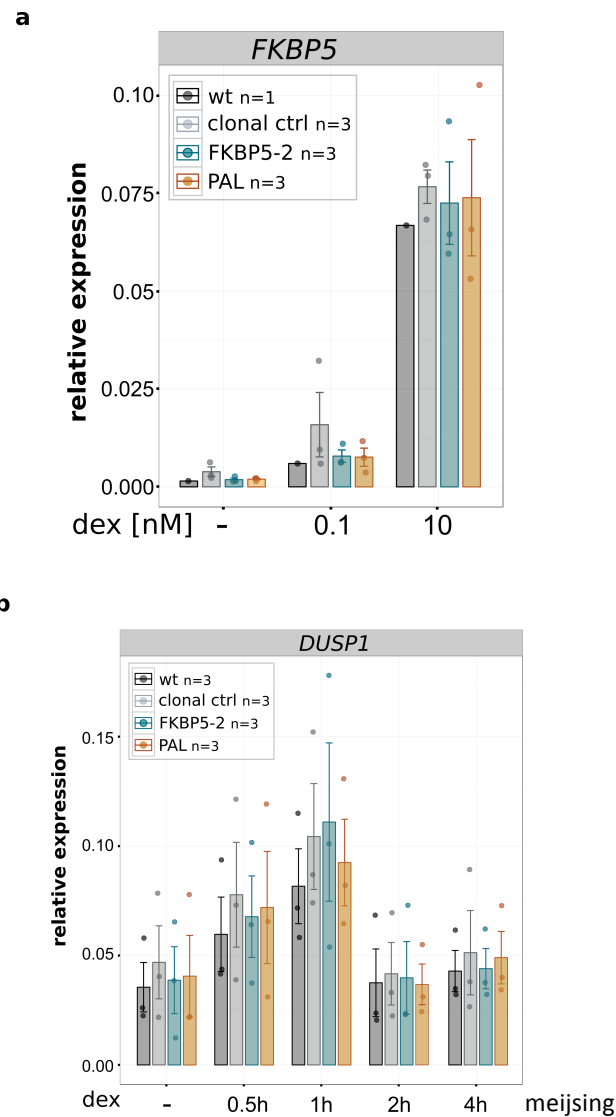

Source: https://www.biorxiv.org/content/10.1101/494708v1.full.pdf
